# Supplementary material
Source: publisher figshare collection journal article supplement (https://tandf.figshare.com/ndownloader/files/13247798)
Supplement: Supplementary file 1 [file 13247798]

Table S1. Collection information for samples included in this study.

| **Species, ID #’s** | **Location, Province/State***a,* **Country***b* | **Latitude, longitude** | **Date** | **Collector(s)***c* |
| --- | --- | --- | --- | --- |
| *Acanthosiphonia echinata* (Harvey) Savoie and G.W.Saunders | |  |  |  |
| GWS006229 | Kouchibouguac lagoon seagrass beds, NB, Canada | 46.8348, -64.9299 | 27.8.2007 | GWS |
| GWS006238 | Kouchibouguac lagoon seagrass beds, NB, Canada | 46.8348, -64.9299 | 27.8.2007 | BC & KD |
| GWS006239 | Kouchibouguac lagoon seagrass beds, NB, Canada | 46.8348, -64.9299 | 27.8.2007 | BC & KD |
| GWS006240 | Kouchibouguac lagoon seagrass beds, NB, Canada | 46.8348, -64.9299 | 27.8.2007 | BC & KD |
| GWS008071 | South Harbour, Aspey Bay, Cape Breton, NS, Canada | 46.8797, 60.4538 | 13.10.2006 | L. Penny |
| GWS012465 | South Harbour, Cape Breton Island, NS, Canada | 46.8672, -60.4471 | 21.8.2010 | KD |
| GWS027643 | Tabusintac, NB, Canada | 47.3275, -64.978 | 1.9. 2012 | MB & CL |
| GWS032162 | Pomquet (far on Monks Head Road), NS, Canada | 45.6589, -61.8218 | 16.8.2012 | GWS, AS, CL, KD & MB |
| GWS032166 | Pomquet (far on Monks Head Road), NS, Canada | 45.6589, -61.8218 | 16.8.2012 | GWS, AS, CL, KD & MB |
| GWS032170 | Pomquet (far on Monks Head Road), NS, Canada | 45.6589, -61.8218 | 16.8.2012 | GWS, AS, CL, KD & MB |
| GWS032171 | Pomquet (far on Monks Head Road), NS, Canada | 45.6589, -61.8218 | 16.8.2012 | GWS, AS, CL, KD & MB |
| GWS032172 | Pomquet (far on Monks Head Road), NS, Canada | 45.6589, -61.8218 | 16.8.2012 | GWS, AS, CL, KD & MB |
| GWS032173 | Pomquet (far on Monks Head Road), NS, Canada | 45.6589, -61.8218 | 16.8.2012 | GWS, AS, CL, KD & MB |
| GWS032174 | Pomquet (far on Monks Head Road), NS, Canada | 45.6589, -61.8218 | 16.8.2012 | GWS, AS, CL, KD & MB |
| GWS032175 | Pomquet (far on Monks Head Road), NS, Canada | 45.6589, -61.8218 | 16.8.2012 | GWS, AS, CL, KD & MB |
| *Amplisiphonia pacifica* Hollenberg | |  |  |  |
| GWS014483 | Bamfield, Deadmans Cove (rocks out towards Kia Bay), BC, Canada | 48.776, -125.198 | 28.6.2011 | GWS & KD |
| *Carradoriella elongata* (Hudson) Savoie and G.W.Saunders | |  |  |  |
| GWS030132 | Plymouth Beach, MA, USA | 41.9447, -70.6258 | 18.4.2012 | AS & MB |
| GWS031855 | Carna, Martin Ryan Institute, Ireland | 53.3107, -9.8303 | 5.7.2012 | MB & A. Frenette |
| GWS038061 | Litlebukken Island, Bergen, Norway | 60.2412, 5.2021 | 3.6.2016 | GWS, TB & C. Armitage |
| GWS038066 | Litlebukken Island, Bergen, Norway | 60.2412, 5.2021 | 3.6.2016 | GWS, TB & C. Armitage |
| GWS038866 (EC066) | Mackerel Cove, Jamestown, RI, USA | 41.4888, -71.3812 | 27.3.2016 | C.W. Schneider |
| GWS040621 | Kleppesjoen, Norway | 60.1847, 5.1494 | 9.6.2016 | GWS & TB |
| GWS040774 | Håkonsund, Norway | 60.1762, 5.1113 | 10.6.2016 | GWS & TB |
| GWS040777 | Håkonsund, Norway | 60.1762, 5.1113 | 10.6.2016 | GWS & TB |
| GWS040834 | Stora Lauvøyna, Norway | 60.4425, 5.0646 | 11.6.2016 | GWS & TB |
| 2016_BIO309A_02 | Seløysund, Indre Korsfjorden, Hordaland, Norway | 60.2418, 5.2399 | 14.4.2016 | K. Sjøtun |
| *Carradoriella virgata* (C.Agardh) P.C.Silva | |  |  |  |
| GWS036360 | Rooi-Els, Western Cape, South Africa | -34.2965, 18.8136 | 24.11.2014 | KD & JFC |
| GWS036398 | Off the end of Shelley Point, St Helena Bay, Western Cape, South Africa | -32.7021, 17.9666 | 28.11.2014 | KD & JFC |
| GWS036401 | Off the end of Shelley Point, St Helena Bay, Western Cape, South Africa | -32.7021, 17.9666 | 28.11.2014 | KD & JFC |
| *Eutrichosiphonia confusa* (Hollenberg) Savoie and G.W.Saunders | |  |  |  |
| GWS021926 | Santa Cruz (Four Mile), CA, USA | 36.9661, -122.1234 | 19.5.2010 | BC, KH & ST |
| GWS021963 | Santa Cruz (Four Mile), CA, USA | 36.9661, -122.1234 | 19.5.2010 | BC, KH & ST |
| GWS021965 | Santa Cruz (Four Mile), CA, USA | 36.9661, -122.1234 | 19.5.2010 | BC, KH & ST |
| GWS022071 | Santa Cruz (Four Mile), CA, USA | 36.9661, -122.1234 | 19.5.2010 | BC, KH & ST |
| *Herposiphonia plumula* (J.Agardh) Falkenberg | |  |  |  |
| GWS027411 | Panther Pt., Wallace I., BC, Canada | 48.9294, -123.531 | 3.5.2011 | GWS & KH |
| *Kapraunia schneideri* (B.Stuercke & D.W.Freshwater) Savoie and G.W.Saunders | | |  |  |
| EC061 | Quonochontaug Central Beach, Charleston, RI, USA | 41.3369, -71.7019 | 22.7.2015 | C.W. Schneider |
| GWS031240 | Patriot’s Point, Mt. Plesant, Charleston Harbor, South Carolina, USA | 34.7852, -79.9082 | 22.6.2012 | LK & GF |
| GWS031241 | Patriot’s Point, Mt. Plesant, Charleston Harbor, South Carolina, USA | 34.7852, -79.9082 | 22.6.2012 | LK & GF |
| *Leptosiphonia fibrillosa* (Dillwyn) Savoie & G.W.Saunders | |  |  |  |
| GWS038049 | Litlebukken Island, Bergen, Norway | 60.2412, 5.2021 | 3.6.2016 | GWS, TB & C. Armitage |
| GWS040833 | Stora Lauvøyna (at intersection with Fv219), Norway | 60.44247, 5.06462 | 11.6.2016 | GWS & TB |
| GWS040869 | Stora Lauvøyna (at intersection with Fv219), Norway | 60.44247, 5.06462 | 11.6.2016 | GWS & TB |
| GWS040913 | Oksneset, Askøy, Norway | 60.5308, 4.9852 | 12.6.2016 | GWS & TB |
| GWS040914 | Oksneset, Askøy, Norway | 60.5308, 4.9852 | 12.6.2016 | GWS & TB |
| 2016_BIO309A_18 | Seløysund, Indre Korsfjorden, Hordaland, Norway | 60.2418, 5.2399 | 14.4.2016 | K. Sjøtun |
| *Leptosiphonia* sp._1*fibrillosa* | |  |  |  |
| GWS007061 | St. Paul, Bonne Bay, NFLD, Canada | 49.8656, 59.2911 | 11.7.2006 | LLG, HK & JU |
| GWS007062 | St. Paul, Bonne Bay, NFLD, Canada | 49.8656, 59.2911 | 11.7.2006 | LLG, HK & JU |
| GWS007938 | L'Anse Bleue Breakwater, Northumberland Strait, NB, Canada | 47.8313, -66.0828 | 15.8.2006 | LLG, HK & JU |
| GWS013808 | Upper Blandford, Mahone Bay, NS, Canada | 44.5052, -64.1230 | 29.7.2009 | GWS & DS |
| GWS013809 | Upper Blandford, Mahone Bay, NS, Canada | 44.5052, -64.1230 | 29.7.2009 | GWS & DS |
|  | |  |  |  |
| *Leptosiphonia flexicaulis* (Harvey) Savoie & G.W.Saunders | |  |  |  |
| GWS002290 | Little Anse, Isle Madame, Cape Breton, NS, Canada | 45.4917, -60.9252 | 29.8.2004 | GWS |
| GWS002298 | Little Anse, Isle Madame, Cape Breton, NS, Canada | 45.4917, -60.9252 | 29.8.2004 | GWS |
| GWS002689 | Owls Head Lighthouse near Rockland, ME, USA | 44.0899, -69.0462 | 15.4.2005 | GWS |
| GWS007030 | Norris Point, Bonne Bay Marine Station, NFLD, Canada | 49.5178, -57.8739 | 11.7.2006 | LLG & JU |
| GWS007101 | Rock across inlet from Bonne Bay Station, NFLD, Canada | 49.5283, 57.8250 | 12.7.2006 | LLG & JU |
| GWS007111 | Maerl bed (btw Deer Arm & East Arm), Bonne Bay, NFLD, Canada | 49.5253, -57.8256 | 13.7.2006 | LLG, BH & JU |
| GWS007268 | Green Point, Bonne Bay, NFLD, Canada | 49.6820, -57.9628 | 15.7.2006 | LLG & HK |
| GWS007364 | Bottle Cove, NFLD, Canada | 49.1142, -58.4136 | 17.7.2006 | DM, JU & LLG |
| GWS007393 | Bottle Cove, NFLD, Canada | 49.1142, -58.4136 | 17.7.2006 | DM, JU & LLG |
| GWS007766 | Bras d’Or Lake entrance (bridge near exit 13), NS, Canada | 46.2304, -60.4856 | 28.7.2006 | LLG, HK & DM |
| GWS008829 | SE of Beaver Harbour in SCUBA Bay, Bay of Fundy, NB, Canada | 45.0563, -66.7358 | 12.9.2007 | GWS, KD & DM |
| GWS008830 | SE of Beaver Harbour in SCUBA Bay, Bay of Fundy, NB, Canada | 45.0563, -66.7358 | 12.9.2007 | GWS, KD & DM |
| GWS008831 | SE of Beaver Harbour in SCUBA Bay, Bay of Fundy, NB, Canada | 45.0563, -66.7358 | 12.9.2007 | GWS, KD & DM |
| GWS008840 | SE of Beaver Harbour in SCUBA Bay, Bay of Fundy, NB, Canada | 45.0563, -66.7358 | 12.9.2007 | KD, GWS & DM |
| GWS011609 | Orby Head, near North Rustico, Prince Edward Island, Canada | 46.4906, -63.3053 | 28.7.2008 | GWS & MB |
| GWS011660 | Gala Point, East of Charlottetown, Prince Edward Island, Canada | 46.1141, -63.0057 | 29.7.2008 | GWS, DM, SH & MB |
| GWS011862 | Paddys Head, NS, Canada | 44.5261, -63.9474 | 18.5.2009 | GWS & DM |
| GWS013793 | Birch Island, Cobscook Bay, ME, USA | 44.8706, -67.1494 | 25.7.2009 | GWS |
| GWS014024 | Deer Island ferry terminal, NB, Canada | 44.9274, -66.9848 | 28.8.2010 | AS & MB |
| GWS014025 | Deer Island ferry terminal, NB, Canada | 44.9274, -66.9848 | 28.8.2010 | AS & MB |
| GWS030165 | Folly Cove, Gloucester, right side, MA, USA | 42.6850, -70.6415 | 19.4.2012 | AS |
| GWS030228 | Carrying Cove, New River Beach, NB, Canada | 45.1299, -66.5262 | 15.5.2012 | GWS, AS, MB & KD |
| GWS032382 | Wallace Cove Dive Site, NB, Canada | 45.0433, -66.8087 | 19.6.2015 | GWS & TB |
| GWS032402 | Anse au Foin, Grosses-Roches, Quebec, Canada | 48.9371, -67.1937 | 15.9.2012 | KD |
| GWS039103 | Wallace Cove Lighthouse, NB, Canada | 45.0386, -66.8077 | 3.9.2015 | GWS & KM |
| GWS039397 | Turnagain I., Labrador, NFLD, Canada | 56.7659, -61.3106 | 9.9.2014 | GWS, KD & CEL |
| GWS039419 | Point NW of Lighthouse, Makkovic, Labrador, NFLD, Canada | 55.1017, -59.1800 | 11.9.2014 | GWS, KD & CEL |
| GWS040409 | Point NW of Lighthouse, Makkovic, Labrador, NFLD, Canada | 55.1017, -59.1800 | 11.9.2014 | GWS, KD & CEL |
| GWS040412 | Point NW of Lighthouse, Makkovic, Labrador, NFLD, Canada | 55.1017, -59.1800 | 11.9.2014 | GWS, KD & CEL |
| GWS040440 | Makkovic Wharf Beach, Labrador, NFLD, Canada | 55.0841, -59.1725 | 11.9.2014 | TB |
| *Lophurella periclados* (Sonder) F.Schmitz | |  |  |  |
| GWS016008 | Hells Gates (beach to north), Tasmania, Australia | -42.2172, 145.2229 | 25.1.2010 | LK |
| *Melanothamnus afaqhusainii* M.Shameel | |  |  |  |
| GWS014134 | Hatom Cove, east of Mirbat, Dhofar, Sultanate of Oman | 16.9609, 54.8280 | 8.9.2001 | M. Wynne |
| *Melanothamnus harveyi* (Bailey) Díaz-Tapia & Maggs | |  |  |  |
| GWS005627 | Cape Neddick, ME, USA | 43.1658, -70.5924 | 3.11.2006 | GWS & DM |
| GWS005798 | Summerside (bike trail), Prince Edward Island, Canada | 46.39478, -63.7991 | 18.8.2007 | BC, KD & KR |
| GWS005799 | Summerside (bike trail), Prince Edward Island, Canada | 46.39478, -63.7991 | 18.8.2007 | BC, KD & KR |
| GWS006020 | Hazard Ave., Narragansett, RI, USA | 41.4145, -71.45258 | 23.4.2007 | GWS, BC & DM |
| GWS006034 | Hazard Ave., Narragansett, RI, USA | 41.4145, -71.45258 | 23.4.2007 | GWS, BC & DM |
| GWS006222 | Kouchibouguac lagoon seagrass beds, NB, Canada | 46.8348, -64.9299 | 27.8.2007 | GWS |
| GWS006247 | Kouchibouguac; Kellys Beach, NB, Canada | 46.8288, -64.9055 | 27.8.2007 | GWS |
| GWS006260 | Richebucto Cape Breakwater, NB, Canada | 46.6754, -64.7109 | 28.8.2007 | GWS & KD |
| GWS006261 | Richebucto Cape Breakwater, NB, Canada | 46.6754, -64.7109 | 28.8.2007 | GWS & KD |
| GWS006262 | Richebucto Cape Breakwater, NB, Canada | 46.6754, -64.7109 | 28.8.2007 | GWS & KD |
| GWS006264 | Richebucto Cape Breakwater, NB, Canada | 46.6754, -64.7109 | 28.8.2007 | GWS & KD |
| GWS006265 | Richebucto Cape Breakwater, NB, Canada | 46.6754, -64.7109 | 28.8.2007 | GWS & KD |
| GWS007774 | Bras d'Or Lake entrance (bridge near exit 13), NS, Canada | 46.23036, -60.4856 | 28.7.2006 | LLG, HK & DM |
| GWS007778 | White Pt., NS, Canada | 46.88226, -60.35077 | 28.7.2006 | HK |
| GWS007779 | White Pt., NS, Canada | 46.88226, -60.35077 | 28.7.2006 | HK |
| GWS007781 | White Pt., NS, Canada | 46.88226, -60.35077 | 28.7.2006 | HK |
| GWS007782 | White Pt., NS, Canada | 46.88226, -60.35077 | 28.7.2006 | HK |
| GWS007783 | White Pt., NS, Canada | 46.88226, -60.35077 | 28.7.2006 | HK |
| GWS007968 | Cap des Caissie, North of Shediac, NB, Canada | 46.3266, -64.5157 | 17.8.2006 | LLG, HK & JU |
| GWS007976 | Cap des Caissie, North of Shediac, NB, Canada | 46.3266, -64.5157 | 17.8.2006 | LLG, HK & JU |
| GWS008000 | St. Thomas, Northumberland Strait, NB, Canada | 46.4480, -64.6418 | 17.8.2006 | LLG, HK & JU |
| GWS008774 | Cable Head, Prince Edward Island, Canada | 46.46283, -62.6074 | 19.8.2007 | BC, KD & KR |
| GWS008775 | Cable Head, Prince Edward Island, Canada | 46.46283, -62.6074 | 19.8.2007 | BC, KD & KR |
| GWS008794 | Cable Head, Prince Edward Island, Canada | 46.46283, -62.6074 | 19.8.2007 | BC, KD & KR |
| GWS010963 | Sam Orr’s Pond, NB, Canada | 45.16196, -67.04457 | 23.7.2008 | GWS, SH, M. Lang & R. Campbell |
| GWS012474 | Sam Orr's Pond, NB, Canada | 45.16196, -67.04457 | 23.8.2010 | GWS & AS |
| GWS012475 | Sam Orr's Pond, NB, Canada | 45.16196, -67.04457 | 23.8.2010 | GWS & AS |
| GWS012476 | Sam Orr's Pond, NB, Canada | 45.16196, -67.04457 | 23.8.2010 | GWS & AS |
| GWS012477 | Sam Orr's Pond, NB, Canada | 45.16196, -67.04457 | 23.8.2010 | GWS & AS |
| GWS012478 | Sam Orr's Pond, NB, Canada | 45.16196, -67.04457 | 23.8.2010 | GWS & AS |
| GWS012479 | Sam Orr's Pond, NB, Canada | 45.16196, -67.04457 | 23.8.2010 | GWS & AS |
| GWS012480 | Sam Orr's Pond, NB, Canada | 45.16196, -67.04457 | 23.8.2010 | GWS & AS |
| GWS013918 | Sam Orr’s Pond, NB, Canada | 45.16196, -67.04457 | 5.10.2009 | GWS & DM |
| GWS014713 | White Horse Beach, Plymouth, MA, USA | 41.93361, -70.56046 | 12.4.2010 | BC, DM, MB, AS, CL |
| GWS014729 | White Horse Beach, Plymouth, MA, USA | 41.93361, -70.56046 | 12.4.2010 | BC, DM, MB, AS, CL |
| GWS017872 | Garbage Beach Breakwater, Woods Hole, MA, USA | 41.52518, -70.67256 | 14.4.2010 | BC, DM, MB, AS, CL |
| GWS024016 | Beach off of Smith Neck Rd., South Dartmouth, MA, USA | 41.5783, -70.9489 | 1.8.1988 | E. Duffield |
| GWS024026 | Rockland , ME, USA | 44.11583, -69.08454 | 29.9.2011 | GWS |
| GWS024027 | Rockland , ME, USA | 44.11583, -69.08454 | 29.9.2011 | GWS |
| GWS024030 | Rockland , ME, USA | 44.11583, -69.08454 | 29.9.2011 | GWS |
| GWS024065 | Acadia's Oceanside Meadows Inn, Sand Cove, ME, USA | 44.4138, -68.0096 | 1.10.2011 | AS & MB |
| GWS024066 | Acadia's Oceanside Meadows Inn, Sand Cove, ME, USA | 44.4138, -68.00956 | 1.10.2011 | AS & MB |
| GWS024067 | Acadia's Oceanside Meadows Inn, Sand Cove, ME, USA | 44.4138, -68.0096 | 1.10.2011 | AS & MB |
| GWS024069 | Acadia's Oceanside Meadows Inn, Sand Cove, ME, USA | 44.4138, -68.0096 | 1.10.2011 | AS & MB |
| GWS027800 | Corporation Beach, MA, USA | 41.751835, -70.1874 | 13.4.2011 | GWS, KD, AS, MB & DM |
| GWS027845 | White Horse Beach, Plymouth, MA, USA | 41.93361, -70.56046 | 14.4.2011 | GWS, KD, AS, MB & DM |
| GWS027846 | White Horse Beach, Plymouth, MA, USA | 41.93361, -70.56046 | 14.4.2011 | GWS, KD, AS, MB & DM |
| GWS030050 | Hazard Ave., Narragansett, RI, USA | 41.4145, -71.45258 | 17.4.2012 | GWS, AS, MB & KD |
| GWS030051 | Hazard Ave., Narragansett, RI, USA | 41.4145, -71.45258 | 17.4.2012 | GWS, AS, MB & KD |
| GWS030054 | Hazard Ave., Narragansett, RI, USA | 41.4145, -71.45258 | 17.4.2012 | GWS, AS, MB & KD |
| GWS030060 | Hazard Ave., Narragansett, RI, USA | 41.4145, -71.45258 | 17.4.2012 | GWS, AS, MB & KD |
| GWS030064 | Hazard Ave., Narragansett, RI, USA | 41.4145, -71.45258 | 17.4.2012 | GWS, AS, MB & KD |
| GWS030065 | Hazard Ave., Narragansett, RI, USA | 41.4145, -71.45258 | 17.4.2012 | GWS, AS, MB & KD |
| GWS030067 | Hazard Ave., Narragansett, RI, USA | 41.4145, -71.45258 | 17.4.2012 | GWS, AS, MB & KD |
| GWS030068 | Hazard Ave., Narragansett, RI, USA | 41.4145, -71.45258 | 17.4.2012 | GWS, AS, MB & KD |
| GWS030069 | Hazard Ave., Narragansett, RI, USA | 41.4145, -71.45258 | 17.4.2012 | GWS, AS, MB & KD |
| GWS030122 | Garbage Beach Breakwater, Woods Hole, MA, USA | 41.52518, -70.67256 | 18.4.2012 | AS |
| GWS030124 | Garbage Beach Breakwater, Woods Hole, MA, USA | 41.52518, -70.67256 | 18.4.2012 | AS |
| GWS030125 | Garbage Beach Breakwater, Woods Hole, MA, USA | 41.52518, -70.67256 | 18.4.2012 | AS |
| GWS030126 | Garbage Beach Breakwater, Woods Hole, MA, USA | 41.52518, -70.67256 | 18.4.2012 | AS |
| GWS030127 | Garbage Beach Breakwater, Woods Hole, MA, USA | 41.52518, -70.67256 | 18.4.2012 | AS |
| GWS030131 | Plymouth Beach, MA, USA | 41.94474, -70.62578 | 18.4.2012 | AS & MB |
| GWS030154 | Folly Cove, Gloucester, right side, MA, USA | 42.68502, -70.64148 | 19.4.2012 | GWS |
| GWS030155 | Folly Cove, Gloucester, right side, MA, USA | 42.68502, -70.64148 | 19.4.2012 | GWS |
| GWS030157 | Folly Cove, Gloucester, right side, MA, USA | 42.68502, -70.64148 | 19.4.2012 | MB |
| GWS031207 | Lepreau - seagrass flats near bridge along highway, NB, Canada | 45.127, -66.4576 | 10.10.2013 | AS, GF, & CJ |
| GWS031216 | Peggys Cove, NS, Canada | 44.4905, -63.9166 | 16.10.2013 | GWS & AS |
| GWS031223 | Peggys Cove, NS, Canada | 44.4905, -63.9166 | 16.10.2013 | GWS & AS |
| GWS031224 | Peggys Cove, NS, Canada | 44.4905, -63.9166 | 16.10.2013 | GWS & AS |
| GWS031553 | Lepreau - seagrass flats near bridge along highway , NB, Canada | 45.127, -66.4576 | 23.9.2012 | GWS & AS |
| GWS031554 | Lepreau - seagrass flats near bridge along highway , NB, Canada | 45.127, -66.4576 | 23.9.2012 | GWS & AS |
| GWS031557 | Lepreau - seagrass flats near bridge along highway , NB, Canada | 45.127, -66.4576 | 23.9.2012 | GWS & AS |
| GWS032033 | Meisners Beach, Mahone Bay, NS, Canada | 44.57391, -64.15651 | 13.8.2012 | GWS, AS, MB, KD & CL |
| GWS032037 | Meisners Beach, Mahone Bay, NS, Canada | 44.57391, -64.15651 | 13.8.2012 | GWS, AS, MB, KD & CL |
| GWS032038 | Meisners Beach, Mahone Bay, NS, Canada | 44.57391, -64.15651 | 13.8.2012 | GWS, AS, MB, KD & CL |
| GWS032074 | Birchy Head, St. Margarets Bay, NS, Canada | 44.56834, -64.03632 | 14.8.2012 | GWS, AS, MB, KD & CL |
| GWS032076 | Birchy Head, St. Margarets Bay, NS, Canada | 44.56834, -64.03632 | 14.8.2012 | GWS, AS, MB, KD & CL |
| GWS032077 | Birchy Head, St. Margarets Bay, NS, Canada | 44.56834, -64.03632 | 14.8.2012 | GWS, AS, MB, KD & CL |
| GWS032080 | Birchy Head, St. Margarets Bay, NS, Canada | 44.56834, -64.03632 | 14.8.2012 | GWS, AS, MB, KD & CL |
| GWS032081 | Birchy Head, St. Margarets Bay, NS, Canada | 44.56834, -64.03632 | 14.8.2012 | GWS, AS, MB, KD & CL |
| GWS032141 | Gaulman Pt., NS, Canada | 45.35468, -61.19365 | 15.8.2012 | GWS & AS |
| GWS032143 | Gaulman Pt., NS, Canada | 45.35468, -61.19365 | 15.8.2012 | GWS & AS |
| GWS032148 | Gaulman Pt., NS, Canada | 45.35468, -61.19365 | 15.8.2012 | GWS & AS |
| GWS032150 | Gaulman Pt., NS, Canada | 45.35468, -61.19365 | 15.8.2012 | GWS & AS |
| GWS032152 | Gaulman Pt., NS, Canada | 45.35468, -61.19365 | 15.8.2012 | KD & MB |
| GWS032164 | Pomquet (far on Monks Head Road), NS, Canada | 45.65894, -61.82183 | 16.8.2012 | GWS, AS, CL, KD & MB |
| GWS032179 | Pomquet (far on Monks Head Road), NS, Canada | 45.65894, -61.82183 | 16.8.2012 | GWS, AS, CL, KD & MB |
| GWS032184 | Pomquet (Bridge), NS, Canada | 45.64773, -61.83361 | 16.8.2012 | GWS, AS, CL, KD & MB |
| GWS032185 | Pomquet (Bridge), NS, Canada | 45.64773, -61.83361 | 16.8.2012 | GWS, AS, CL, KD & MB |
| GWS032186 | Pomquet (Bridge), NS, Canada | 45.64773, -61.83361 | 16.8.2012 | GWS, AS, CL, KD & MB |
| GWS034790 | Maces Bay, Lepreau, Bay of Fundy, NB, Canada | 45.1093, -66.4817 | 10.10.2013 | AS, GF, & CJ |
| GWS039650 | Birchy Head, St. Margarets Bay, NS, Canada | 44.56834, -64.03632 | 29.8.2015 | GWS, TB, MB, KM & AS |
| GWS039651 | Birchy Head, St. Margarets Bay, NS, Canada | 44.56834, -64.03632 | 29.8.2015 | GWS, TB, MB, KM & AS |
| GWS039725 | Birchy Head, St. Margarets Bay, NS, Canada | 44.56834, -64.03632 | 29.8.2015 | GWS, TB, MB, KM & AS |
| *Melanothamnus* sp._21GWS | |  |  |  |
| GWS003033 | Bamfield, Ross Islets, BC, Canada | 48.874, -125.16 | 14.6.2005 | GWS |
| *Neorhodomela aculeata* (L.P.Perestenko) Masuda | |  |  |  |
| GWS028686 | East side of Powrivco Bay, Gwaii Haanas, BC, Canada | 52.6876, -131.5523 | 11.7.2011 | GWS & KD |
| *Odonthalia dentata* (Linnaeus) Lyngbye | |  |  |  |
| GWS008808 | Gadd Point, Bonne Bay, NFLD, Canada | 49.5192, -57.8775 | 4.9.2007 | BH & SC |
| *Polyostea arctica* (J.Agardh) Savoie & G.W.Saunders | |  |  |  |
| GWS007126*d* | Maerl bed (btw Deer Arm & East Arm), Bonne Bay, NFLD, Canada | 49.5253, -57.8256 | 13.7.2006 | LLG, BH & JU |
| *Polyostea bipinnata* (Postels & Ruprecht) Ruprecht | |  |  |  |
| KAM0009*d* | Eastern Kamchatka, Avacha Gulf, Starichkov Island, Kamchatka region, Russian Federation | 52.783, -158.617 | 10.6.2013 | G.G. Zhigadlova |
| *Polyostea hamata* (E.S.Sinova) Savoie & G.W.Saunders | |  |  |  |
| GWS008375*d* | Ridley Island, Prince Rupert, BC, Canada | 54.221, -130.329 | 10.6.2007 | DM, BC & GWS |
| GWS027925*d* | Lost Islands, SE wall, Gwaii Haanas, BC, Canada | 52.8006, -131.4841 | 6.7.2011 | GWS & KD |
| *Polyostea robusta* (N.L.Gardner) Savoie & G.W.Saunders | |  |  |  |
| GWS022431*d* | Roberts Creek, Sunshine Coast, BC, Canada | 49.4231 -123.6559 | 23.5.2010 | KD |
| *Polysiphonia akkeshiensis* Segi | |  |  |  |
| GWS002931 | Bamfield, ‘Sparlingia Pt.’, Bradys Beach, BC, Canada | 48.8242, -125.1593 | 8.6.2005 | SC |
| GWS003116 | Bamfield, Scotts Bay, BC, Canada | 48.8346, -125.1463 | 13.9.2005 | R. Withall |
| GWS004313 | Bamfield, Trail Head, inner most reach of inlet, BC, Canada | 48.8124, -125.1571 | 24.6.2006 | GWS, BC & DM |
| GWS009069 | Bamfield, Bradys Beach, BC, Canada | 48.824, -125.159 | 23.9.2007 | GWS & BC |
| GWS010305 | Tahsis, Mozina Pt., BC, Canada | 49.8592, -126.6745 | 26.5.2008 | GWS & BC |
| GWS012519 | Park at end of Honna Rd., Queen Charlotte City, Haida Gwaii, BC, Canada | 53.25, -132.117 | 15.6.2009 | GWS & DM |
| GWS030063 | Hazard Ave., Narragansett, RI, USA | 41.4145, -71.45258 | 17.4.2012 | GWS, AS, MB & KD |
| *Polysiphonia kapraunii* B.Stuercke & D.W.Freshwater | |  |  |  |
| GWS013757 | Sam Orr’s Pond, NB, Canada | 45.1620, -67.0446 | 23.8.2010 | GWS & AS |
| *Polysiphonia morrowii* Harvey | |  |  |  |
| GWS008179 | Bamfield, Scotts Bay, BC, Canada | 48.8346, -125.1463 | 3.6.2007 | HK |
| GWS012867 | Warden Station Huxley Island, Gwaii Haanas, BC, Canada | 52.4332, -131.3704 | 20.6.2009 | GWS & DM |
| GWS013420 | Burnaby (Dolomite) Narrows, Gwaii Haanas, BC, Canada | 52.3599, -131.3520 | 23.6.2009 | GWS & DM |
| GWS013422 | Burnaby (Dolomite) Narrows, Gwaii Haanas, BC, Canada | 52.3599, -131.3520 | 23.6.2009 | GWS & DM |
| GWS019916 | Koga Islet, Gwaii Haanas, BC, Canada | 52.4283, -131.3786 | 12.6.2010 | GWS & KD |
| GWS019932 | Koga Islet, Gwaii Haanas, BC, Canada | 52.4283, -131.3786 | 12.6.2010 | GWS & KD |
| GWS019952 | Koga Islet, Gwaii Haanas, BC, Canada | 52.4283, -131.3786 | 12.6.2010 | GWS & KD |
| GWS021067 | West of Juskatla Narrows, Masset Inlet, Haida Gwaii, BC, Canada | 53.6743, -132.3771 | 9.6.2010 | GWS & KD |
| GWS034862 | Channel marker 2 NW Bowen Isl., BC, Canada | 49.3888, -123.4091 | 17.5.2013 | GWS & KD |
| *Polysiphonia* *determinata* (Hollenberg) Savoie and G.W.Saunders stat. nov. | |  |  |  |
| GWS003128 | Pachena Beach, Bamfield, BC, Canada | 48.7862, -125.1191 | 13.9.2005 | GWS |
| GWS004014 | Bamfield, Blowhole at Bradys Beach, BC, Canada | 48.824, -125.1621 | 15.6.2006 | GWS, BC & DM |
| GWS004015 | Bamfield, Blowhole at Bradys Beach, BC, Canada | 48.824, -125.1621 | 15.6.2006 | GWS, BC & DM |
| GWS005172 | Butze Rapids, Prince Rupert, BC, Canada | 54.3007, -130.2507 | 12.7.2006 | GWS, BC & DM |
| GWS013001 | Scudder Point, Burnaby Island, Gwaii Haanas, BC, Canada | 52.446, -131.23251 | 20.6.2009 | GWS & DM |
| GWS021754 | Jade Cove, CA, USA | 35.9134, -121.4698 | 18.5.2010 | BC & KH |
| GWS021825 | Jade Cove, CA, USA | 35.9134, -121.4698 | 18.5.2010 | BC & KH |
| GWS021830 | Jade Cove, CA, USA | 35.9134, -121.4698 | 18.5.2010 | BC & KH |
| GWS021838 | Jade Cove, CA, USA | 35.9134, -121.4698 | 18.5.2010 | BC & KH |
| GWS030584 | Louscoone Point, Gwaii Haanas, BC, Canada | 52.1273, -131.2349 | 8.6.2012 | GWS & KD |
| GWS036012 | Beach W of Marco Island, Gwaii Haanas, BC, Canada | 52.5117, -131.5022 | 21.8.2013 | GWS & KD |
|  | |  |  |  |
| *Polysiphonia pacifica* var. *disticha* Hollenberg | |  |  |  |
| GWS021393 | Pigeon Point Lighthouse, CA, USA | 37.18316, -122.3887 | 15.5.2010 | BC & KH |
| *Polysiphonia pacifica* var. *pacifica* Hollenberg | |  |  |  |
| GWS002975 | Bamfield, Scotts Bay, BC, Canada | 48.8346, -125.1463 | 9.6.2005 | GWS & J. Mortimer |
| GWS003019 | Bamfield, Black Fish I., near Helby I., BC, Canada | 48.8473, -125.1653 | 13.6.2005 | J. Mortimer & GWS |
| GWS004881 | Tree Knob Islands, Prince Rupert, BC, Canada | 54.2342, 130.8036 | 9.7.2006 | GWS, BC & DM |
| GWS006555 | Tahsis, Princesa Channel, BC, Canada | 49.7247, -126.6425 | 29.5.2007 | BC, DM, KR & SH |
| GWS006556 | Tahsis, Princesa Channel, BC, Canada | 49.7247, -126.6425 | 29.5.2007 | BC, DM, KR & SH |
| GWS006559 | Tahsis, Princesa Channel, BC, Canada | 49.7247, -126.6425 | 29.5.2007 | BC, DM, KR & SH |
| GWS008735 | Bamfield, Wizard I., BC, Canada | 48.8583, -125.1588 | 16.6.2007 | GWS, BC, DM & KR |
| GWS008736 | Bamfield, Wizard I., BC, Canada | 48.8583, -125.1588 | 16.6.2007 | GWS, BC, DM & KR |
| GWS009098 | Bamfield, Dixon I., BC, Canada | 48.8524, -125.1224 | 23.9.2007 | GWS & BC |
| GWS009643 | Tahsis, Island #40 on Esperenza Inlet Chart, BC, Canada | 49.8125, -126.98733 | 20.5.2008 | GWS & BC |
| GWS010248 | Tahsis, Princesa Channel, BC, Canada | 49.7247, -126.6425 | 25.5.2008 | GWS & BC |
| GWS012587 | Chaatl Island across from Newton Point, Haida Gwaii, BC, Canada | 53.1303, -132.5064 | 16.6.2009 | GWS & DM |
| GWS012588 | Chaatl Island across from Newton Point, Haida Gwaii, BC, Canada | 53.1303, -132.5064 | 16.6.2009 | GWS & DM |
| GWS014312 | Bamfield, Scotts Bay, BC, Canada | 48.8346, -125.1463 | 25.6.2011 | GWS & KD |
| GWS019419 | Bamfield, Execution Rock, BC, Canada | 48.8142, -125.1785 | 31.5.2010 | GWS & KD |
| GWS019476 | Bamfield, ‘Sparlingia Pt.’, Bradys Beach, BC, Canada | 48.8242, -125.1593 | 1.6.2010 | GWS & KD |
| GWS019487 | Bamfield, Taylor Islet, BC, Canada | 48.8267, -125.1992 | 1.6.2010 | GWS & KD |
| GWS022117 | Stillwater Cove, Pebble Beach, CA, USA | 36.5667, -121.9429 | 20.5.2010 | BC, KH & ST |
| GWS022157 | Stillwater Cove, Pebble Beach, CA, USA | 36.5667, -121.9429 | 20.5.2010 | BC, KH & ST |
| GWS027970 | Lost Islands, SE wall, Gwaii Haanas, BC, Canada | 52.8006, -131.4840 | 6.7.2011 | GWS & KD |
| GWS028203 | Hot Spring Island (back side), Gwaii Haanas, BC, Canada | 52.5779, -131.4377 | 7.7.2011 | GWS & KD |
| GWS028298 | Hoskins Islets (east wall of southern island), Gwaii Haanas, BC, Canada | 52.5377, -131.5469 | 8.7.2011 | GWS & KD |
| GWS028337 | Hoskins Islets (rocky knoll btw), Gwaii Haanas, BC, Canada | 52.5383, -131.5476 | 8.7.2011 | GWS & KD |
| GWS028547 | Kloo Rock, Gwaii Haanas, BC, Canada | 52.5873, -131.3681 | 10.7.2011 | GWS & KD |
| GWS030666 | Bay south of Bowles Point, Gwaii Haanas, BC, Canada | 52.0648, -131.1194 | 9.6.2012 | GWS & KD |
| GWS030690 | North side of East Copper Island, Gwaii Haanas, BC, Canada | 52.3604, -131.1794 | 10.6.2012 | GWS & KD |
| GWS030766 | Nereocystis bed NE of Rebecca Point, Gwaii Haanas, BC, Canada | 52.3833, -131.2809 | 11.6.2012 | GWS & KD |
| GWS036859 | Iphigenia Pt., Langara, Haida Gwaii, BC, Canada | 54.1926, -133.0168 | 14.7.2015 | GWS & MB |
| GWS038599 | Rocks off the NE corner of Murchison Island, Gwaii Haanas, BC, Canada | 52.6181, -131.4390 | 14.7.2014 | KD & AS |
| *Polysiphonia* sp._1*pacifica* | |  |  |  |
| GWS006522 | Tahsis Narrows, BC, Canada | 49.4453, -126.8275 | 29.5.2007 | BC, DM & SH |
| GWS006607 | Tahsis, Island #40 on Esperenza Inlet Chart, BC, Canada | 49.8125, -126.9873 | 30.5.2007 | BC, DM, KR & SH |
| GWS006654 | Tahsis, Island #40 on Esperenza Inlet Chart, BC, Canada | 49.8125, -126.9873 | 30.5.2007 | BC, DM, KR & SH |
| GWS009959 | Tahsis, Island #40 on Esperenza Inlet Chart, BC, Canada | 49.8125, -126.9873 | 21.5.2008 | GWS & BC |
| GWS019291 | Bamfield, ‘Sparlingia Pt.’, Bradys Beach, BC, Canada | 48.8242, -125.1593 | 29.5.2010 | GWS & KD |
| GWS020321 | East Copper Island (easterly point), Gwaii Haanas, BC, Canada | 52.3576, -131.1736 | 14.6.2010 | GWS & KD |
| GWS021134 | Cowley Islands, Masset Inlet, Haida Gwaii, BC, Canada | 53.6923, -132.3678 | 9.6.2010 | GWS & KD |
| GWS021480 | Sea Lion Point North, Point Lobos State Reserve, CA, USA | 36.5192, -121.9530 | 16.5.2010 | BC & KH |
| GWS021850 | Jade Cove, CA, USA | 35.9134, -121.4698 | 18.5.2010 | BC & KH |
| GWS021856 | Jade Cove, CA, USA | 35.9134, -121.4698 | 18.5.2010 | BC & KH |
| GWS027981 | Lost Islands, SE wall, Gwaii Haanas, BC, Canada | 52.8006, -131.4840 | 6.7.2011 | GWS & KD |
| GWS030412 | Raspberry Cove, Gwaii Haanas, BC, Canada | 52.1666, -131.0837 | 6.6.2012 | GWS & KD |
| GWS031470 | Gordon Islands (West), Gwaii Haanas, BC, Canada | 52.0974, -131.1502 | 4.6.2012 | GWS & KD |
| GWS035025 | Dorman Bay, Bowen Isl., BC, Canada | 49.3757, -123.3205 | 18.5.2013 | GWS & KD |
| GWS035751 | Louscoone Pt. (wall to the NE), Gwaii Haanas, BC, Canada | 52.1302, -131.2333 | 17.8.2013 | GWS & KD |
| GWS038605 | Rocks off the NE corner of Murchison Island, Gwaii Haanas, BC, Canada | 52.6181, -131.4390 | 14.7.2014 | KD & AS |
| GWS038901 | East Narrows (2nd rock) Skidegate Channel, Haida Gwaii, BC, Canada | 53.1453, -132.2425 | 10.7.2014 | GWS & MB |
| *Polysiphonia* sp._2*pacifica* | |  |  |  |
| GWS008580 | Comox Marina Breakwater, BC, Canada | 49.6692, -124.9289 | 15.6.2007 | GWS, BC, DM & KR |
| GWS027037 | Between 1st and 2nd beach, English Bay, Vancouver, BC, Canada | 49.2924, -123.1500 | 30.6.2011 | KD |
| *Polysiphonia scopulorum* var. *villum* (J.Agardh) Hollenberg | |  |  |  |
| GWS002902 | Bamfield, Blowhole at Bradys Beach, BC, Canada | 48.8235, -125.1613 | 8.6.2005 | GWS |
| GWS004788 | Ruth Island, Port Hardy, BC, Canada | 50.8556, -127.6433 | 4.7.2006 | BC & DM |
| GWS006329 | Pier near statue of diver, Sidney, BC, Canada | 48.6481, -123.3936 | 24.5.2007 | DM, BC, KR & SH |
| GWS006336 | Pier near statue of diver, Sidney, BC, Canada | 48.6481, -123.3936 | 24.5.2007 | DM, BC, KR & SH |
| GWS008217 | Bamfield, Blowhole at Bradys Beach, BC, Canada | 48.824, -125.1621 | 4.6.2007 | DM, BC, KR & HK |
| GWS008218 | Bamfield, Blowhole at Bradys Beach, BC, Canada | 48.824, -125.1621 | 4.6.2007 | DM, BC, KR & HK |
| GWS008278 | Pachena Beach, Bamfield, BC, Canada | 48.7862, -125.1191 | 5.6.2007 | DM, BC, KR & HK |
| GWS009051 | Mears Bluff, Broken Group, BC, Canada | 48.86557, -125.2916 | 22.9.2007 | GWS & BC |
| GWS019608 | Ucluelet, Sargison Bank, BC, Canada | 48.92205, -125.4207 | 2.6.2010 | GWS & KD |
| GWS019672 | Bamfield, Scotts Bay, BC, Canada | 48.8346, -125.1463 | 3.6.2010 | GWS & KD |
| GWS020743 | Kwuna Island, Haida Gwaii, BC, Canada | 53.21722, -131.9859 | 6.6.2010 | GWS & KD |
| GWS020755 | Kwuna Island, Haida Gwaii, BC, Canada | 53.21722, -131.9859 | 6.6.2010 | GWS & KD |
| GWS022212 | McAbee Beach, Monterey, CA, USA | 36.61524, -121.8995 | 21.5.2010 | BC, KH & ST |
| GWS022224 | McAbee Beach, Monterey, CA, USA | 36.61524, -121.8995 | 21.5.2010 | BC, KH & ST |
| GWS022244 | McAbee Beach, Monterey, CA, USA | 36.61524, -121.8995 | 21.5.2010 | BC, KH & ST |
| GWS022266 | McAbee Beach, Monterey, CA, USA | 36.61524, -121.8995 | 21.5.2010 | BC, KH & ST |
| GWS022301 | Lover's Point, Pacific Grove, CA, USA | 36.62661, -121.9164 | 22.5.2010 | BC & ST |
| GWS022390 | Aquarium Reef, Monterey Bay, CA, USA | 36.6199, -121.8991 | 23.5.2010 | BC & ST |
| GWS028437 | Saw Reef (W side), Gwaii Haanas, BC, Canada | 52.4494, -131.2831 | 9.7.2011 | GWS & KD |
| GWS034876 | Worlcombe Isl. (east point), BC, Canada | 49.3484, -123.4529 | 17.5.2013 | GWS & KD |
| GWS036020 | Beach W of Marco Island, Gwaii Haanas, BC, Canada | 52.5117, -131.5022 | 21.8.2013 | GWS & KD |
| *Polysiphonia* sp._1*paniculata* | |  |  |  |
| GWS002705 | Pachena Beach, Bamfield, BC, Canada | 48.786, -125.119 | 4.6.2005 | GWS |
| GWS002921 | Bamfield, Blowhole at Bradys Beach, BC, Canada | 48.824, -125.162 | 8.6.2005 | GWS |
| GWS003136 | Bamfield, Execution Rock, BC, Canada | 48.814, -125.178 | 14.9.2005 | R. Withall |
| GWS004032 | Bamfield, Blowhole at Bradys Beach, BC, Canada | 48.824, -125.162 | 15.6.2006 | GWS, BC & DM |
| GWS004738 | Browning Wall, north of Port Hardy, BC, Canada | 50.847, -127.644 | 4.7.2006 | BC & DM |
| GWS006824 | ‘Lands End’ up the left side of Pachena Bay, Bamfield, BC, Canada | 48.772, -125.158 | 2.6.2007 | BC, DM, KR & HK |
| GWS006827 | ‘Lands End’ up the left side of Pachena Bay, Bamfield, BC, Canada | 48.772, -125.158 | 2.6.2007 | BC, DM, KR & HK |
| GWS006836 | ‘Lands End’ up the left side of Pachena Bay, Bamfield, BC, Canada | 48.772, -125.158 | 2.6.2007 | BC, DM, KR & HK |
| GWS008127 | ‘Lands End’ up the left side of Pachena Bay, Bamfield, BC, Canada | 48.772, -125.158 | 2.6.2007 | BC, DM, KR & HK |
| GWS008201 | Bamfield, Blowhole at Bradys Beach, BC, Canada | 48.824, -125.162 | 4.6.2007 | DM, BC, KR & HK |
| GWS008438 | Pier at Davis Bay Sunshine Coast, BC, Canada | 49.445, -123.73 | 12.6.2007 | GWS & DM |
| GWS008965 | Bamfield, Execution Rock, BC, Canada | 48.814, -125.178 | 21.9.2007 | GWS & BC |
| GWS008991 | Bamfield, Scotts Bay, BC, Canada | 48.835, -125.146 | 21.9.2007 | GWS & BC |
| GWS009009 | Reef N. of Island 76, Broken Group, BC, Canada | 48.876, -125.361 | 22.9.2007 | GWS & BC |
| GWS010472 | Bamfield, Execution Rock, BC, Canada | 48.814, -125.178 | 1.6.2008 | BC & ST |
| GWS010534 | Bamfield, Dixon I. (up-channel bay) , BC, Canada | 48.854, -125.137 | 2.6.2008 | BC |
| GWS010593 | Bamfield, Wizard I. , BC, Canada | 48.858, -125.159 | 3.6.2008 | KH & DM |
| GWS012522 | Park at end of Honna Rd., Queen Charlotte City, Haida Gwaii, BC, Canada | 53.25, -132.117 | 15.6.2009 | GWS & DM |
| GWS012639 | Mazarredo Islands, NW of Masset, Haida Gwaii, BC, Canada | 54.091, -132.551 | 17.6.2009 | GWS & DM |
| GWS012997 | Scudder Point, Burnaby Island, Gwaii Haanas, BC, Canada | 52.446, -131.233 | 20.6.2009 | GWS & DM |
| GWS013316 | Murchison Island Lagoon, Gwaii Haanas, BC, Canada | 52.604, -131.45 | 22.6.2009 | GWS & DM |
| GWS013421 | Burnaby (Dolomite) Narrows, Gwaii Haanas, BC, Canada | 52.36, -131.352 | 23.6.2009 | GWS & DM |
| GWS013553 | Newberry Cove (east side of western inlet), Gwaii Haanas, BC, Canada | 52.462, -131.447 | 24.6.2009 | GWS & DM |
| GWS013663 | Warden Station Huxley Island, Gwaii Haanas, BC, Canada | 52.433, -131.37 | 25.6.2009 | GWS & DM |
| GWS014408 | Bamfield, Bordelais Is. (North Bay), BC, Canada | 48.819, -125.231 | 26.6.2011 | GWS & KD |
| GWS014475 | Bamfield, Deadmans Cove (rocks out towards Kia Bay), BC, Canada | 48.776, -125.198 | 28.6.2011 | GWS & KD |
| GWS019411 | Bamfield, Execution Rock, BC, Canada | 48.814, -125.178 | 31.5.2010 | GWS & KD |
| GWS019975 | Warden Station Huxley Island, Gwaii Haanas, BC, Canada | 52.433, -131.37 | 12.6.2010 | GWS & KD |
| GWS020620 | North Beach (near Naval Station), Haida Gwaii, BC, Canada | 54.033, -132.053 | 17.6.2010 | GWS & KD |
| GWS020635 | North Beach (near Naval Station), Haida Gwaii, BC, Canada | 54.033, -132.053 | 17.6.2010 | GWS & KD |
| GWS022433 | 600m N/W of Roberts Creek Rivermouth, Roberts Creek, Sunshine Coast, BC, Canada | 49.423, -123.656 | 23.5.2010 | KD |
| GWS022434 | 600m N/W of Roberts Creek Rivermouth, Roberts Creek, Sunshine Coast, BC, Canada | 49.423, -123.656 | 23.5.2010 | KD |
| GWS027399 | Panther Pt., Wallace I. , BC, Canada | 48.929, -123.531 | 3.5.2011 | GWS & KH |
| GWS027536 | Beddis Beach (left point & seagrass bed), Salt Spring, BC, Canada | 48.81, -123.425 | 6.5.2011 | GWS, KH & BC |
| GWS027538 | Beddis Beach (left point & seagrass bed), Salt Spring, BC, Canada | 48.81, -123.425 | 6.5.2011 | GWS, KH & BC |
| GWS027552 | Beddis Beach (left point & seagrass bed), Salt Spring, BC, Canada | 48.81, -123.425 | 6.5.2011 | GWS, KH & BC |
| GWS028078 | Channel btw Murchison & Faraday Is., Gwaii Haanas, BC, Canada | 52.597, -131.475 | 7.7.2011 | GWS & KD |
| GWS028425 | Scudder Point (SE coast), Gwaii Haanas, BC, Canada | 52.443, -131.234 | 9.7.2011 | GWS & KD |
| GWS030945 | Nakons Islet, Gwaii Haanas, BC, Canada | 52.436, -131.357 | 13.6.2012 | GWS & KD |
| GWS031402 | Gordon Islands (Lagoon), Gwaii Haanas, BC, Canada | 52.097, -131.15 | 4.6.2012 | GWS & KD |
| GWS038627 | Rocks off the NE corner of Murchison Island, Gwaii Haanas, BC, Canada | 52.618, -131.439 | 14.7.2014 | KD & AS |
| *Polysiphonia* sp._2*paniculata* | |  |  |  |
| GWS002983 | Cape Beale, Postelsia Pt., Bamfield, BC, Canada | 48.79, -125.216 | 10.6.2005 | GWS |
| GWS003026 | Bamfield, Ross Islets, BC, Canada | 48.874, -125.16 | 14.6.2005 | GWS |
| GWS004587 | Pachena Beach, Bamfield, BC, Canada | 48.786, -125.119 | 28.6.2006 | GWS, BC & DM |
| GWS006386 | Whiffen Spit, Sooke Harbour, Vancouver Island, BC, Canada | 48.352, -123.728 | 25.5.2007 | HK |
| GWS006610 | Tahsis, Island #40 on Esperenza Inlet Chart, BC, Canada | 49.812, -126.987 | 30.5.2007 | BC, DM, KR & SH |
| GWS008276 | Pachena Beach, Bamfield, BC, Canada | 48.786, -125.119 | 5.6.2007 | DM, BC, KR & HK |
| GWS019264 | Bamfield, Wizard I. , BC, Canada | 48.858, -125.159 | 28.5.2010 | GWS & KD |
| GWS021293 | Pigeon Point Lighthouse, CA, USA | 37.183, -122.389 | 15.5.2010 | BC & KH |
| GWS021488 | Sea Lion Point North, Point Lobos State Reserve, CA, USA | 36.519, -121.953 | 16.5.2010 | BC & KH |
| GWS021489 | Sea Lion Point North, Point Lobos State Reserve, CA, USA | 36.519, -121.953 | 16.5.2010 | BC & KH |
| GWS021991 | Santa Cruz (Four Mile), CA, USA | 36.966, -122.123 | 19.5.2010 | BC, KH & ST |
| GWS022002 | Santa Cruz (Four Mile) , CA, USA | 36.966, -122.123 | 19.5.2010 | BC, KH & ST |
| GWS022316 | Bird Rock, Pacific Grove, CA, USA | 36.592, -121.964 | 22.5.2010 | BC, KH & ST |
| GWS027311 | Beaver Pt., Salt Spring I., BC, Canada | 48.774, -123.372 | 2.5.2011 | GWS & KH |
| *Polysiphonia* sp._23GWS | |  |  |  |
| GWS017992 | Fort Wetherill, RI, USA | 41.4791, -71.3607 | 16.4.2010 | BC, DM, MB, AS, CL |
| GWS018035 | Fort Wetherill, RI, USA | 41.4791, -71.3607 | 16.4.2010 | BC, DM, MB, AS, CL |
| GWS031556 | Lepreau - seagrass flats near bridge along highway, NB, Canada | 45.1270, -66.4576 | 23.9.2012 | GWS & AS |
| GWS040626 | Kleppesjoen, Norway | 60.18474, 5.14938 | 9.6.2016 | GWS & TB |
| GWS040627 | Kleppesjoen, Norway | 60.18474, 5.14938 | 9.6.2016 | GWS & TB |
| GWS040681 | Kleppesjoen, Norway | 60.18474, 5.14938 | 9.6.2016 | GWS & TB |
| GWS040703 | Kleppesjoen, Norway | 60.18474, 5.14938 | 9.6.2016 | GWS & TB |
| GWS040797 | Håkonsund, Norway | 60.17615, 5.11132 | 10.6.2016 | GWS & TB |
| GWS040896 | Oksneset, Askøy, Norway | 60.53082, 4.98519 | 12.6.2016 | GWS & TB |
| *Polysiphonia stricta* (Dillwyn) Greville | |  |  |  |
| GWS002518 | Front at Peggys Cove, NS, Canada | 44.491, -63.919 | 23.11.2004 | GWS |
| GWS003662 | End of public road, Starboard, ME, USA | 44.609, -67.397 | 25.4.2006 | GWS, LLG, DM, SC & CEL |
| GWS003726 | Pettes Cove, Grand Manan, NB, Canada | 44.763, -66.739 | 26.5.2006 | GWS, BC & DM |
| GWS003885 | Lepreau exposed biodiversity site, Bay of Fundy, NB, Canada | 45.072, -66.469 | 29.5.2006 | LLG |
| GWS007394 | Bottle Cove, NFLD, Canada | 49.114, -58.414 | 17.7.2006 | DM, JU & LLG |
| GWS009768 | Brier Island Northern Light (exposed rocky site), NS, Canada | 44.288, -66.342 | 29.5.2008 | HK & SH |
| GWS009770 | Brier Island Northern Light (exposed rocky site) , NS, Canada | 44.288, -66.342 | 29.5.2008 | HK & SH |
| GWS009771 | Brier Island Northern Light (exposed rocky site) , NS, Canada | 44.288, -66.342 | 29.5.2008 | HK & SH |
| GWS013735 | Herring Cove Head (small bay to east), Campobello Island, NB, Canada | 44.875, -66.926 | 19.8.2009 | GWS, BC & DM |
| GWS013990 | Meadow Cove exposed biodiversity site, Bay of Fundy, NB, Canada | 45.038, -66.891 | 25.8.2010 | GWS, MB, AS & KD |
| GWS013991 | Meadow Cove exposed biodiversity site, Bay of Fundy, NB, Canada | 45.038, -66.891 | 25.8.2010 | GWS, MB, AS & KD |
| GWS014767 | Folly Cove, Gloucester left side, MA, USA | 42.685, -70.641 | 13.4.2010 | DM, MB |
| GWS014768 | Folly Cove, Gloucester left side, MA, USA | 42.685, -70.641 | 13.4.2010 | DM, MB |
| GWS014770 | Folly Cove, Gloucester left side, MA, USA | 42.685, -70.641 | 13.4.2010 | DM, MB |
| GWS017899 | Garbage Beach Breakwater, Woods Hole, MA, USA | 41.525, -70.673 | 14.4.2010 | BC, DM, MB, AS, CL |
| GWS018014 | Fort Witherill, Jamestown, RI, USA | 41.479, -71.361 | 16.4.2010 | BC, DM, MB, AS, CL |
| GWS018112 | Two Lights, Cape Elizabeth, ME, USA | 43.565, -70.199 | 19.4.2010 | BC, DM, MB, AS, CL |
| GWS027817 | Corporation Beach, MA, USA | 41.752, -70.187 | 13.4.2011 | KD & DM |
| GWS027818 | Corporation Beach, MA, USA | 41.752, -70.187 | 13.4.2011 | KD & DM |
| GWS027834 | White Horse Beach, Plymouth, MA, USA | 41.934, -70.56 | 14.4.2011 | GWS, KD, AS, MB & DM |
| GWS031511 | Fairy Head, Cutler Coast Public Reserved Land, ME, USA | 44.663, -67.168 | 21.5.2012 | AS |
| GWS039891 | Ormhilleren (site 1), Norway | 60.4977, 4.9123 | 5.6.2016 | GWS & TB |
| GWS039936 | Ormhilleren (site 1), Norway | 60.4977, 4.9123 | 6.6.2016 | GWS & TB |
| GWS039968 | Ormhilleren, Norway | 60.4936, 4.9190 | 6.6.2016 | GWS & TB |
| GWS040033 | Hellesøy, Norway | 60.6627, 4.7875 | 7.6.2016 | GWS & TB |
| GWS040082 | Hellesøy, Norway | 60.6627, 4.7875 | 8.6.2016 | GWS & TB |
| GWS040907 | Oksneset, Askøy, Norway | 60.5308, 4.9852 | 12.6.2016 | GWS & TB |
| GWS040942 | Tekslo, Norway | 60.1590, 5.0041 | 13.6.2016 | GWS, TB & K. Sjøton |
| *Polysiphonia* sp._1*stricta* | |  |  |  |
| GWS003611 | Cape Neddick, ME, USA | 43.166, -70.592 | 24.4.2006 | GWS |
| GWS003620 | Cape Neddick, ME, USA | 43.166, -70.592 | 24.4.2006 | LLG |
| GWS003829 | Lepreau exposed biodiversity site, Bay of Fundy, NB, Canada | 45.072, -66.469 | 29.5.2006 | HK |
| GWS005271 | Bluff A, Churchill Northern Studies Centre, MB, Canada | 58.77, -93.847 | 20.8.2006 | GWS, BC & DM |
| GWS005284 | Bluff A, Churchill Northern Studies Centre, MB, Canada | 58.77, -93.847 | 20.8.2006 | GWS, BC & DM |
| GWS005293 | Bluff A, Churchill Northern Studies Centre, MB, Canada | 58.77, -93.847 | 20.8.2006 | GWS, BC & DM |
| GWS005713 | Gordon Point, Churchill Northern Studies Centre, MB, Canada | 58.796, -93.754 | 13.7.2007 | DM |
| GWS006176 | Escoumins (east of town across from Rue aux Bouchets), QC, Canada | 48.4, -69.339 | 15.5.2007 | GWS, DM & HK |
| GWS007124 | Maerl bed (btw Deer Arm & East Arm), Bonne Bay, NFLD, Canada | 49.525, -57.826 | 13.7.2006 | LLG, BH & JU |
| GWS007223 | South side of bay mouth, Bonne Bay, NFLD, Canada | 49.548, -57.954 | 14.7.2006 | LLG, BH & JU |
| GWS007403 | Bottle Cove, NFLD, Canada | 49.114, -58.414 | 17.7.2006 | DM, JU & LLG |
| GWS007606 | exposed coast west of Grand Barrachois, France | 47.006, -56.36 | 23.7.2006 | LLG, HK, DM & JU |
| GWS007615 | exposed coast west of Grand Barrachois, France | 47.006, -56.36 | 23.7.2006 | LLG, HK, DM & JU |
| GWS009861 | Port Bickerton Lighthouse (exposed rocky site), NS, Canada | 45.089, -61.698 | 6.2.2008 | HK & SH |
| GWS010969 | Flat Wolf Island, NB, Canada | 44.954, -66.731 | 21.8.2008 | DM, KH, BC, MB |
| GWS010974 | Flat Wolf Island, NB, Canada | 44.954, -66.731 | 21.8.2008 | DM, KH, BC, MB |
| GWS012446 | Pettes Cove, NB, Canada | 44.763, -66.74 | 12.8.2010 | AS, CL |
| GWS012518 | Park at end of Honna Rd, Queen Charlotte City, Haida Gwaii, BC, Canada | 53.25, -132.117 | 15.6.2009 | GWS & DM |
| GWS013740 | Herring Cove Head (small bay to east), Campobello Island, NB, Canada | 44.875, -66.926 | 19.8.2009 | GWS, BC & DM |
| GWS013944 | Maces Bay, Lepreau, Bay of Fundy, NB, Canada | 45.109, -66.482 | 31.3.2010 | AS, GWS |
| GWS013984 | Meadow Cove exposed biodiversity site, Bay of Fundy, NB, Canada | 45.038, -66.891 | 25.8.2010 | GWS, MB, AS & KD |
| GWS014782 | Folly Cove, Gloucester, right side, MA, USA | 42.685, -70.641 | 13.4.2010 | BC, AS |
| GWS018046 | Fort Witherill, Jamestown, RI, USA | 41.479, -71.361 | 16.4.2010 | BC, DM, MB, AS, CL |
| GWS018086 | Two Lights, Cape Elizabeth, ME, USA | 43.565, -70.199 | 19.4.2010 | BC, DM, MB, AS, CL |
| GWS018087 | Two Lights, Cape Elizabeth, ME, USA | 43.565, -70.199 | 19.4.2010 | BC, DM, MB, AS, CL |
| GWS018140 | Two Lights, Cape Elizabeth, ME, USA | 43.565, -70.199 | 19.4.2010 | BC, DM, MB, AS, CL |
| GWS018145 | Two Lights, Cape Elizabeth, ME, USA | 43.565, -70.199 | 19.4.2010 | BC, DM, MB, AS, CL |
| GWS019735 | Alder Island, Gwaii Haanas, BC, Canada | 52.442, -131.319 | 11.6.2010 | GWS & KD |
| GWS027579 | Lepreau exposed biodiversity site, Bay of Fundy, NB, Canada | 45.072, -66.469 | 20.5.2011 | GWS, KD, AS, M. Wolf & SC |
| GWS027840 | White Horse Beach, Plymouth, MA, USA | 41.934, -70.56 | 14.4.2011 | GWS, KD, AS, MB & DM |
| GWS029914 | St. Andrews (Indian Pt.), Bay of Fundy, NB, Canada | 45.05, -67.039 | 12.9.2011 | AS |
| GWS031514 | Fairy Head, Cutler Coast Public Reserved Land, ME, USA | 44.663, -67.168 | 21.5.2012 | AS |
| GWS039422 | Point NW of Lighthouse, Makkovic, Labrador NFLD, Canada | 55.102, -59.18 | 11.9.2014 | GWS, KD & CEL |
| GWS039423 | Point NW of Lighthouse, Makkovic, Labrador NFLD, Canada | 55.102, -59.18 | 11.9.2014 | GWS, KD & CEL |
| GWS039424 | Point NW of Lighthouse, Makkovic, Labrador NFLD, Canada | 55.102, -59.18 | 11.9.2014 | GWS, KD & CEL |
| GWS039432 | Point NW of Lighthouse, Makkovic, Labrador NFLD, Canada | 55.102, -59.18 | 11.9.2014 | GWS, KD & CEL |
| GWS039454 | Point NW of Lighthouse, Makkovic, Labrador NFLD, Canada | 55.102, -59.18 | 11.9.2014 | GWS, KD & CEL |
| GWS039456 | Point NW of Lighthouse, Makkovic, Labrador, NFLD, Canada | 55.102, -59.18 | 11.9.2014 | GWS, KD & CEL |
| *Polysiphonia* sp._3*stricta* | |  |  |  |
| GWS002657 | Letete exposed biodiversity site, Bay of Fundy, NB, Canada | 45.038, -66.891 | 14.3.2005 | GWS |
| GWS003744 | Harrington Cove exposed biodiversity site, Grand Manan, NB, Canada | 44.625, -66.86 | 27.5.2006 | GWS |
| GWS005199 | Riding’s Rock, Meadow Cove, NB, Canada | 45.103, -66.388 | 2.8.2006 | GWS & BC |
| GWS005285 | Bluff A, Churchill Northern Studies Centre, MB, Canada | 58.77, -93.847 | 20.8.2006 | GWS, BC & DM |
| GWS005320 | Gordon Point, Churchill Northern Studies Centre, MB, Canada | 58.796, -93.754 | 21.8.2006 | GWS, BC & DM |
| GWS005716 | Gordon Point, Churchill Northern Studies Centre, MB, Canada | 58.796, -93.754 | 13.7.2007 | DM |
| GWS005913 | SE of Beaver Harbour on rocky cliffs, Bay of Fundy, NB, Canada | 45.056, -66.736 | 19.3.2007 | GWS |
| GWS006045 | Beach Rd., Wickford, RI, USA | 41.565, -71.443 | 23.4.2007 | GWS, BC, DM, SC & SH |
| GWS006976 | Cape Ray, NFLD, Canada | 47.623, -59.291 | 10.7.2006 | LLG & JU |
| GWS007093 | rock across inlet from Bonne Bay Station, NFLD, Canada | 49.528, -59.291 | 12.7.2006 | LLG & JU |
| GWS007098 | rock across inlet from Bonne Bay Station, NFLD, Canada | 49.528, -59.291 | 12.7.2006 | LLG & JU |
| GWS007241 | South side of bay mouth, Bonne Bay, NFLD, Canada | 49.548, -57.954 | 14.7.2006 | LLG, BH & JU |
| GWS014759 | Folly Cove, Gloucester left side, MA, USA | 42.685, -70.641 | 13.4.2010 | DM, MB |
| GWS017861 | Garbage Beach Breakwater, Woods Hole, MA, USA | 41.525, -70.673 | 14.4.2010 | BC, DM, MB, AS, CL |
| GWS017862 | Garbage Beach Breakwater, Woods Hole, MA, USA | 41.525, -70.673 | 14.4.2010 | BC, DM, MB, AS, CL |
| GWS027816 | Corporation Beach, MA, USA | 41.752, -70.187 | 13.4.2011 | KD & DM |
| GWS027860 | Garbage Beach Breakwater, Woods Hole, MA, USA | 41.525, -70.673 | 15.4.2011 | GWS, KD, AS, MB & DM |
| GWS027871 | Falmouth Heights, MA, USA | 41.543, -70.607 | 15.4.2011 | GWS, KD, AS, MB & DM |
| GWS027879 | Off Avery Pt., Groton, CT, USA | 41.314, -72.069 | 26.5.2011 | C.W. Schneider |
| GWS030180 | Schoodic Point (SERC), ME, USA | 44.332, -68.062 | 20.4.2012 | AS |
| GWS032112 | Canso Causeway Canal Lighthouse, NS, Canada | 45.648, -61.415 | 15.8.2012 | KD & MB |
| GWS032370 | Lepreau exposed biodiversity site, Bay of Fundy, NB, Canada | 45.0722, -66.469 | 21.5.2015 | GWS & C. Brooks |
| GWS034083 | Wallace Cove Lighthouse, NB, Canada | 45.039, -66.808 | 1.5.2013 | GWS, CJ & T. Birch |
| GWS039394 | Turnagain I., Labrador, NFLD, Canada | 56.766, -61.311 | 9.9.2014 | GWS, KD & CEL |
| GWS039436 | Point NW of Lighthouse, Makkovic, Labrador, NFLD, Canada | 55.102, -59.18 | 11.9.2014 | GWS, KD & CEL |
| GWS039442 | Point NW of Lighthouse, Makkovic, Labrador, NFLD, Canada | 55.102, -59.18 | 11.9.2014 | GWS, KD & CEL |
| GWS039444 | Point NW of Lighthouse, Makkovic, Labrador, NFLD, Canada | 55.102, -59.18 | 11.9.2014 | GWS, KD & CEL |
| GWS039446 | Point NW of Lighthouse, Makkovic, Labrador, NFLD, Canada | 55.102, -59.18 | 11.9.2014 | GWS, KD & CEL |
| GWS039461 | Point NW of Lighthouse, Makkovic, Labrador, NFLD, Canada | 55.102, -59.18 | 11.9.2014 | GWS, KD & CEL |
| GWS040436 | Makkovic Wharf Beach, Labrador, NFLD, Canada | 55.084, -59.172 | 11.9.2014 | TB |
| GWS040453 | Makkovic Wharf Beach, Labrador, NFLD, Canada | 55.084, -59.172 | 11.9.2014 | TB |
| *Pterosiphonia cloiophylla* (C.Agardh) Falkenberg | |  |  |  |
| GWS036383 | Jongensfontein, Western Cape, South Africa | -34.433, 21.323 | 26.11.2014 | KD & R. Anderson |
| *Rhodomela confervoides* (Hudson) P.C.Silva | |  |  |  |
| GWS018104 | Two Lights, Cape Elizabeth, ME, USA | 43.5648, -70.1986 | 19.4.2010 | BC, DM, MB, AS, CL |
| *Rhodomela lycopodioides* (Linnaeus) C.Agardh | |  |  |  |
| GWS009336 | Escoumins (east of town across from Rue aux Bouchets), QC, Canada | 48.3997, -69.3392 | 22.4.2008 | GWS, BC & DM |
| *Streblocladia camptoclada* (Montagne) Falkenberg | |  |  |  |
| GWS036399 | Off the end of Shelley Point, St Helena Bay, Western Cape, South Africa | -32.7021, 17.9666 | 28.11.2014 | KD & JFC |
| *Symphyocladia plumosa* Savoie & G.W.Saunders | |  |  |  |
| GWS014494 | Bamfield, opening of Grappler Inlet, BC, Canada | 48.838, -125.134 | 28.6.2011 | GWS & KD |
| *Tayloriella tenebrosa* (Harvey) Kylin | |  |  |  |
| GWS036374 | Preekstoel, Stilbaai, Western Cape, South Africa | -34.3672, 21.4579 | 25.11.2014 | KD & JFC |
| *Veleroa adunca* (J.Agardh) Womersley & Parsons | |  |  |  |
| GWS015067 | Windmill Point, George Town, Tasmania, Australia | -41.1097, 146.8170 | 19.1.2010 | GWS & KD |
| *Vertebrata ericoides* (Harvey) Kuntze | |  |  |  |
| GWS016590 | Marrawah Beach, Tasmania, Australia | -40.933, 144.6 | 29.1.2010 | G.T. Kraft & R. Kraft |
| *Vertebrata hendryi* (N.L.Gardner) Savoie & G.W.Saunders | |  |  |  |
| GWS002753 | Bamfield, Dixon I., BC, Canada | 48.852, -125.122 | 6.6.2005 | GWS & SC |
| GWS002854 | Bamfield, Wizard I., BC, Canada | 48.858, -125.159 | 7.6.2005 | GWS |
| GWS002855 | Bamfield, Wizard I., BC, Canada | 48.858, -125.159 | 7.6.2005 | GWS |
| GWS002920 | Bamfield, Blowhole at Bradys Beach, BC, Canada | 48.824, -125.162 | 8.6.2005 | GWS |
| GWS002994 | Cape Beale, Postelsia Pt., Bamfield, BC, Canada | 48.79, -125.216 | 10.6.2005 | GWS |
| GWS003031 | Bamfield, Ross Islets, BC, Canada | 48.874, -125.16 | 14.6.2005 | GWS |
| GWS003370 | ‘Lands End’ up the left side of Pachena Bay, Bamfield, BC, Canada | 48.772, -125.158 | 12.6.2006 | GWS, BC & DM |
| GWS003917 | Bamfield, Dixon I., BC, Canada | 48.852, -125.122 | 13.6.2006 | GWS, BC & DM |
| GWS004065 | Bamfield, Wizard I., BC, Canada | 48.858, -125.159 | 16.6.2006 | GWS, BC & DM |
| GWS004980 | Ridley Island (south of coal terminal), Prince Rupert, BC, Canada | 54.221, -130.329 | 11.7.2006 | GWS, BC & DM |
| GWS005038 | Ridley Island (south of coal terminal), Prince Rupert, BC, Canada | 54.221, -130.329 | 11.7.2006 | GWS, BC & DM |
| GWS006439 | Spring Bay, BC, Canada | 48.456, -123.269 | 26.5.2007 | HK |
| GWS006441 | Spring Bay, BC, Canada | 48.456, -123.269 | 26.5.2007 | HK |
| GWS006618 | Tahsis, Island #40 on Esperenza Inlet Chart, BC, Canada | 49.812, -126.987 | 30.5.2007 | BC, DM, KR & SH |
| GWS006773 | Tahsis, Friendly Cove, BC, Canada | 49.593, -126.616 | 31.5.2007 | DM, BC, KR & HK |
| GWS006821 | ‘Lands End’ up the left side of Pachena Bay, Bamfield, BC, Canada | 48.772, -125.158 | 2.6.2007 | BC, DM, KR & HK |
| GWS006832 | ‘Lands End’ up the left side of Pachena Bay, Bamfield, BC, Canada | 48.772, -125.158 | 2.6.2007 | BC, DM, KR & HK |
| GWS008240 | Bamfield, Blowhole at Bradys Beach, BC, Canada | 48.824, -125.162 | 4.6.2007 | DM, BC, KR & HK |
| GWS008254 | Bamfield, Blowhole at Bradys Beach, BC, Canada | 48.824, -125.162 | 4.6.2007 | DM, BC, KR & HK |
| GWS008340 | Ridley Island (south of coal terminal), Prince Rupert, BC, Canada | 54.221, -130.329 | 8.6.2007 | GWS, BC, DM & KR |
| GWS008364 | Ridley Island (south of coal terminal), Prince Rupert, BC, Canada | 54.221, -130.329 | 8.6.2007 | GWS, BC, DM & KR |
| GWS009068 | Bamfield, Bradys Beach, BC, Canada | 48.824, -125.159 | 23.9.2007 | GWS & BC |
| GWS009511 | Nine Mile Beach, Sechelt, BC, Canada | 49.59, -123.784 | 16.5.2008 | GWS |
| GWS012521 | Park at end of Honna Rd., Queen Charlotte City, Haida Gwaii, BC, Canada | 53.25, -132.117 | 15.6.2009 | GWS & DM |
| GWS012763 | Burnaby Island near Saw Reef, Gwaii Haanas, BC, Canada | 52.449, -131.283 | 19.6.2009 | GWS & DM |
| GWS013002 | Scudder Point, Burnaby Island, Gwaii Haanas, BC, Canada | 52.446, -131.233 | 20.6.2009 | GWS & DM |
| GWS013101 | Ramsey Island (point adjacent Kloo Rock), Gwaii Haanas, BC, Canada | 52.586, -131.372 | 21.6.2009 | GWS & DM |
| GWS014304 | Bamfield, Scotts Bay, BC, Canada | 48.835, -125.146 | 25.6.2011 | GWS & KD |
| GWS019288 | Bamfield, Blowhole at Bradys Beach, BC, Canada | 48.824, -125.162 | 29.5.2010 | GWS & KD |
| GWS019733 | Alder Island, Gwaii Haanas, BC, Canada | 52.442, -131.319 | 11.6.2010 | GWS & KD |
| GWS019923 | Koga Islet, Gwaii Haanas, BC, Canada | 52.428, -131.379 | 12.6.2010 | GWS & KD |
| GWS019962 | Koga Islet, Gwaii Haanas, BC, Canada | 52.428, -131.379 | 12.6.2010 | GWS & KD |
| GWS020064 | Saw Reef, Gwaii Haanas, BC, Canada | 52.45, -131.292 | 13.6.2010 | GWS & KD |
| GWS020070 | Saw Reef, Gwaii Haanas, BC, Canada | 52.45, -131.292 | 13.6.2010 | GWS & KD |
| GWS020359 | East Copper Island (easterly point), Gwaii Haanas, BC, Canada | 52.358, -131.174 | 14.6.2010 | GWS & KD |
| GWS021834 | Jade Cove, CA, USA | 35.913, -121.47 | 18.5.2010 | BC, KH |
| GWS022439 | Roberts Creek, Sunshine Coast, BC, Canada | 49.423, -123.656 | 23.5.2010 | KD |
| GWS022447 | Roberts Creek, Sunshine Coast, BC, Canada | 49.423, -123.656 | 23.5.2010 | KD |
| GWS027493 | Trail on Scot Point Dr., Salt Spring, BC, Canada | 48.85, -123.444 | 5.5.2011 | GWS, KH & BC |
| GWS027507 | Walkers Hook (rocky point), Salt Spring, BC, Canada | 48.893, -123.503 | 6.5.2011 | GWS, KH & BC |
| GWS027521 | Walkers Hook (rocky point), Salt Spring, BC, Canada | 48.893, -123.503 | 6.5.2011 | GWS, KH & BC |
| GWS028272 | Haswell Bay (stream at southeast), Gwaii Haanas, BC, Canada | 52.523, -131.589 | 8.7.2011 | GWS & KD |
| GWS030321 | Blackburn Point, Gwaii Haanas, BC, Canada | 52.112, -130.996 | 5.6.2012 | GWS & KD |
| GWS030358 | Blackburn Point, Gwaii Haanas, BC, Canada | 52.112, -130.996 | 5.6.2012 | GWS & KD |
| GWS030381 | Blackburn Point, Gwaii Haanas, BC, Canada | 52.112, -130.996 | 5.6.2012 | GWS & KD |
| GWS030388 | Blackburn Point, Gwaii Haanas, BC, Canada | 52.112, -130.996 | 5.6.2012 | GWS & KD |
| GWS030442 | Raspberry Cove, Gwaii Haanas, BC, Canada | 52.167, -131.084 | 6.6.2012 | GWS & KD |
| GWS031343 | Ferry Terminal, Skidegate, Haida Gwaii, BC, Canada | 53.246, -132.009 | 3.6.2012 | GWS & KD |
| GWS035301 | Point between Tana and Gudal Bays, Haida Gwaii, BC, Canada | 53.194, -132.589 | 23.8.2013 | GWS & KD |
| GWS035964 | Cape Saint James (S rocks), Gwaii Haanas, BC, Canada | 51.934, -131.01 | 20.8.2013 | GWS & KD |
| GWS036011 | Beach W of Marco Island, Gwaii Haanas, BC, Canada | 52.512, -131.502 | 21.8.2013 | GWS & KD |
| GWS038572 | Southern beach, Gogit Point, Lyell Island, Gwaii Haanas, BC, Canada | 52.68, -131.447 | 12.7.2014 | KD & AS |
| GWS038576 | Southern beach, Gogit Point, Lyell Island, Gwaii Haanas, BC, Canada | 52.68, -131.447 | 12.7.2014 | KD & AS |
| GWS038580 | Newberry Cove (east side of western inlet), Gwaii Haanas, BC, Canada | 52.462, -131.447 | 13.7.2014 | KD & AS |
| GWS038623 | Rocks off the NE corner of Murchison Island, Gwaii Haanas, BC, Canada | 52.618, -131.439 | 14.7.2014 | KD & AS |
| GWS039049 | Westacott Pt., Haida Gwaii, BC, Canada | 54.078, -132.244 | 14.7.2014 | GWS & MB |
| *Vertebrata lanosa* (Linnaeus) T.A.Christensen | |  |  |  |
| GWS000001 | Lepreau exposed biodiversity site, Bay of Fundy, NB, Canada | 45.0722, -66.469 | 7.10.1995 | GWS |
| GWS002679 | Samoset Resort, ME, USA | 44.1187, -69.0784 | 15.4.2005 | GWS |
| GWS003570 | Lepreau exposed biodiversity site, Bay of Fundy, NB, Canada | 45.0722, -66.469 | 3.3.2006 | GWS |
| GWS003631 | End of public road, Starboard, ME, USA | 44.6091, -67.3966 | 25.4.2006 | GWS, LLG, DM, SC & CEL |
| GWS003842 | Lepreau exposed biodiversity site, Bay of Fundy, NB, Canada | 45.0722, -66.469 | 29.5.2006 | HK |
| GWS005661 | Meadow Cove exposed biodiversity site, Bay of Fundy, NB, Canada | 45.0381, -66.8913 | 3.12.2006 | GWS, DS, LLG & DM |
| GWS006055 | Hazard Ave., Narragansett, RI, USA | 41.4145, -71.45258 | 23.4.2007 | GWS, BC, DM, SC & SH |
| GWS007177 | Rocky Harbour, Bonne Bay, NFLD, Canada | 49.60715, 57.94994 | 13.7.2006 | LLG, HK & JU |
| GWS007871 | Cap St. MIr, Digby, NS, Canada | 44.6919, -65.7853 | 12.8.2006 | LLG & JU |
| GWS014765 | Folly Cove, Gloucester left side, MA, USA | 42.68502, -70.64148 | 13.4.2010 | DM, MB |
| GWS014795 | Folly Cove, Gloucester, right side, MA, USA | 42.68502, -70.64148 | 13.4.2010 | BC, AS |
|  | |  |  |  |
| *Vertebrata nigra* (Hudson) Díaz-Tapia & Maggs | |  |  |  |
| GWS014621 | Cuan, Ventry, Kerry, Ireland |  | 11.8.2010 | M.D. Guiry |
| GWS014710 | White Horse Beach, Plymouth, MA, USA | 41.9336, -70.5605 | 12.4.2010 | BC, DM, MB, AS, CL |
| GWS017938 | East Point Beach, Groton, Connecticut, USA | 41.3200, -72.0748 | 15.4.2010 | BC, DM, MB, AS, CL |
| GWS018047 | Fort Wetherill, RI, USA | 41.4791, -71.36066 | 16.4.2010 | BC, DM, MB, AS, CL |
| GWS027839 | White Horse Beach, Plymouth, MA, USA | 41.9336, -70.5605 | 14.4.2011 | GWS, KD, AS, MB & DM |
| GWS030031 | Fort Wetherill, RI, USA | 41.4791, -71.36066 | 17.4.2012 | GWS & AS |
| GWS030032 | Fort Wetherill, RI, USA | 41.4791, -71.36066 | 17.4.2012 | GWS & AS |
| GWS030033 | Fort Wetherill, RI, USA | 41.4791, -71.36066 | 17.4.2012 | GWS & AS |
| GWS030153 | Folly Cove, Gloucester, right side, MA, USA | 42.6850, -70.6415 | 19.4.2012 | GWS |
| GWS030227 | Carrying Cove, New River Beach, NB, Canada | 45.1299, -66.5262 | 15.5.2012 | GWS, AS, MB & KD |
| *Vertebrata* sp._1*fucoides* | |  |  |  |
| GWS003512 | Pomquet Harbour, Antigonish, NS, Canada | 45.662, -61.833 | 11.11.2005 | GWS |
| GWS003608 | Cape Neddick, ME, USA | 43.166, -70.592 | 24.4.2006 | GWS |
| GWS003616 | Cape Neddick, ME, USA | 43.166, -70.592 | 24.4.2006 | LLG |
| GWS005626 | Cape Neddick, ME, USA | 43.166, -70.592 | 3.11.2006 | GWS & DM |
| GWS007048 | St. Paul, Bonne Bay, NFLD, Canada | 49.866, -59.291 | 11.7.2006 | LLG, HK & JU |
| GWS007158 | Rocky Harbour, Bonne Bay, NFLD, Canada | 49.607, -57.95 | 13.7.2006 | LLG, HK & JU |
| GWS007216 | South side of bay mouth, Bonne Bay, NFLD, Canada | 49.548, -57.954 | 14.7.2006 | LLG, BH & JU |
| GWS007243 | South side of bay mouth, Bonne Bay, NFLD, Canada | 49.548, -57.954 | 14.7.2006 | LLG, BH & JU |
| GWS007248 | South side of bay mouth, Bonne Bay, NFLD, Canada | 49.548, -57.954 | 14.7.2006 | LLG, BH & JU |
| GWS007283 | Green Point, Bonne Bay, NFLD, Canada | 49.682, -57.963 | 15.7.2006 | LLG & HK |
| GWS007296 | Vertical wall on east side of South Arm, Bonne Bay, NFLD, Canada | 49.478, -57.901 | 15.7.2006 | LLG & JU |
| GWS007345 | St. Davids, NFLD, Canada | 48.219, -58.864 | 16.7.2006 | LLG & JU |
| GWS007434 | Alexander Bay Causeway near Terra Nova Park, NFLD, Canada | 48.652, -53.906 | 19.7.2006 | LLG, HK & DM |
| GWS007455 | Alexander Bay Causeway near Terra Nova Park, NFLD, Canada | 48.652, -53.906 | 19.7.2006 | LLG, HK & DM |
| GWS007456 | Alexander Bay Causeway near Terra Nova Park, NFLD, Canada | 48.652, -53.906 | 19.7.2006 | LLG, HK & DM |
| GWS007489 | English Harbour East Government Dock, NFLD, Canada | 47.632, -54.886 | 20.7.2006 | LLG, DM & JU |
| GWS007537 | English Harbour Eastern Cove, NFLD, Canada | 47.633, -54.87 | 20.7.2006 | LLG, DM & JU |
| GWS007600 | Exposed coast west of Grand Barrachois, France | 47.006, -56.36 | 23.7.2006 | LLG, HK, DM & JU |
| GWS007797 | White Pt., NS, Canada | 46.882, -60.351 | 28.7.2006 | LLG & DM |
| GWS007924 | Meteghan (front of Auberge du Capitaire), NS, Canada | 44.221, -66.141 | 12.8.2006 | LLG & JU |
| GWS007946 | L’Anse Bleue Breakwater, Northumberland Strait, NB, Canada | 47.831, -66.083 | 15.8.2006 | LLG, HK & JU |
| GWS007955 | L’Anse Bleue Breakwater, Northumberland Strait, NB, Canada | 47.831, -66.083 | 15.8.2006 | LLG, HK & JU |
| GWS007994 | St. Thomas, Northumberland Strait, NB, Canada | 46.448, -64.642 | 17.8.2006 | LLG, HK & JU |
| GWS008773 | Cable Head, PEI, Canada | 46.463, -62.607 | 19.8.2007 | BC, KD & KR |
| GWS009879 | Little Harbour (sheltered site), NS, Canada | 44.708, -62.839 | 6.3.2008 | HK & SH |
| GWS009881 | Little Harbour (sheltered site), NS, Canada | 44.708, -62.839 | 6.3.2008 | HK & SH |
| GWS011667 | Gala Point, East of Charlottetown, PEI, Canada | 46.114, -63.006 | 29.7.2008 | GWS, DM, SH & MB |
| GWS011809 | Fort Wetherill, RI, USA | 41.479, -71.361 | 17.4.2009 | GWS, BC & DM |
| GWS011837 | Paddys Head, Halifax, NS, Canada | 44.526, -63.947 | 18.5.2009 | GWS & DM |
| GWS011863 | Paddys Head, Halifax, NS, Canada | 44.526, -63.947 | 18.5.2009 | GWS & DM |
| GWS011868 | Paddys Head, Halifax, NS, Canada | 44.526, -63.947 | 18.5.2009 | GWS & DM |
| GWS013989 | Meadow Cove exposed biodiversity site, Bay of Fundy, NB, Canada | 45.038, -66.891 | 25.8.2010 | GWS, MB, AS & KD |
| GWS014761 | Folly Cove, Gloucester left side, MA, USA | 42.685, -70.641 | 13.4.2010 | DM, MB |
| GWS017840 | Garbage Beach Breakwater, Woods Hole, MA, USA | 41.525, -70.673 | 14.4.2010 | BC, DM, MB, AS, CL |
| GWS017858 | Garbage Beach Breakwater, Woods Hole, MA, USA | 41.525, -70.673 | 14.4.2010 | BC, DM, MB, AS, CL |
| GWS017927 | East Point Beach, Groton, CT, USA | 41.32, -72.075 | 15.4.2010 | BC, DM, MB, AS, CL |
| GWS017960 | East Point Beach, Groton, CT, USA | 41.32, -72.075 | 15.4.2010 | BC, DM, MB, AS, CL |
| GWS017997 | Fort Witherill, Jamestown, RI, USA | 41.479, -71.361 | 16.4.2010 | BC, DM, MB, AS, CL |
| GWS017998 | Fort Witherill, Jamestown, RI, USA | 41.479, -71.361 | 16.4.2010 | BC, DM, MB, AS, CL |
| GWS018012 | Fort Witherill, Jamestown, RI, USA | 41.479, -71.361 | 16.4.2010 | BC, DM, MB, AS, CL |
| GWS018013 | Fort Witherill, Jamestown, RI, USA | 41.479, -71.361 | 16.4.2010 | BC, DM, MB, AS, CL |
| GWS018028 | Fort Witherill, Jamestown, RI, USA | 41.479, -71.361 | 16.4.2010 | BC, DM, MB, AS, CL |
| GWS018115 | Two Lights, Cape Elizabeth, ME, USA | 43.565, -70.199 | 19.4.2010 | BC, DM, MB, AS, CL |
| GWS018125 | Two Lights, Cape Elizabeth, ME, USA | 43.565, -70.199 | 19.4.2010 | BC, DM, MB, AS, CL |
| GWS018146 | Two Lights, Cape Elizabeth, ME, USA | 43.565, -70.199 | 19.4.2010 | BC, DM, MB, AS, CL |
| GWS018147 | Two Lights, Cape Elizabeth, ME, USA | 43.565, -70.199 | 19.4.2010 | BC, DM, MB, AS, CL |
| GWS024019 | Welch’s Cove, Lepreau, Bay of Fundy, NB, Canada | 45.072, -66.47 | 4.8.2011 | AS |
| GWS030036 | Fort Wetherill, RI, USA | 41.479, -71.361 | 17.4.2012 | GWS & AS |
| GWS030120 | Garbage Beach Breakwater, Woods Hole, MA, USA | 41.525, -70.673 | 18.4.2012 | AS |
| GWS030129 | Plymouth Beach, MA, USA | 41.945, -70.626 | 18.4.2012 | AS, MB |
| GWS030163 | Folly Cove, Gloucester, right side, MA, USA | 42.685, -70.641 | 19.4.2012 | AS |
| GWS032073 | Birchy Head, St. Margarets Bay, NS, Canada | 44.568, -64.036 | 14.8.2012 | GWS, AS, MB, KD & CL |
| GWS032093 | Canso Causeway Canal Lighthouse, NS, Canada | 45.648, -61.415 | 15.8.2012 | GWS & AS |
| GWS032094 | Canso Causeway Canal Lighthouse, NS, Canada | 45.648, -61.415 | 15.8.2012 | GWS & AS |
| GWS032103 | Canso Causeway Canal Lighthouse, NS, Canada | 45.648, -61.415 | 15.8.2012 | GWS & AS |
| *Vertebrata* sp._2*fucoides* | |  |  |  |
| GWS005912 | SE of Beaver Harbour on rocky cliffs, Bay of Fundy, NB, Canada | 45.056, -66.736 | 19.3.2007 | GWS |
| GWS005985 | Pier #5, Narragansett, RI, USA | 41.423, -71.455 | 23.4.2007 | GWS, BC & DM |
| GWS005986 | Pier #5, Narragansett, RI, USA | 41.423, -71.455 | 23.4.2007 | GWS, BC & DM |
| GWS005989 | Pier #5, Narragansett, RI, USA | 41.423, -71.455 | 23.4.2007 | GWS, BC & DM |
| GWS006088 | Fort Wetherill, RI, USA | 41.479, -71.361 | 24.4.2007 | GWS, BC & DM |
| GWS006096 | Fort Wetherill, RI, USA | 41.479, -71.361 | 24.4.2007 | GWS, BC & DM |
| GWS014709 | White Horse Beach, Plymouth, MA, USA | 41.934, -70.56 | 12.4.2010 | BC, DM, MB, AS, CL |
| GWS014711 | White Horse Beach, Plymouth, MA, USA | 41.934, -70.56 | 12.4.2010 | BC, DM, MB, AS, CL |
| GWS014720 | White Horse Beach, Plymouth, MA, USA | 41.934, -70.56 | 12.4.2010 | BC, DM, MB, AS, CL |
| GWS017850 | Garbage Beach Breakwater, Woods Hole, MA, USA | 41.525, -70.673 | 14.4.2010 | BC, DM, MB, AS, CL |
| GWS017939 | East Point Beach, Groton, CT, USA | 41.32, -72.075 | 15.4.2010 | BC, DM, MB, AS, CL |
| GWS017994 | Fort Witherill, Jamestown, RI, USA | 41.479, -71.361 | 16.4.2010 | BC, DM, MB, AS, CL |
| GWS027801 | Corporation Beach, MA, USA | 41.752, -70.187 | 13.4.2011 | GWS, KD, AS, MB & DM |
| GWS027823 | Corporation Beach, MA, USA | 41.752, -70.187 | 13.4.2011 | KD & DM |
| GWS027824 | Corporation Beach, MA, USA | 41.752, -70.187 | 13.4.2011 | KD & DM |
| GWS027832 | White Horse Beach, Plymouth, MA, USA | 41.934, -70.56 | 14.4.2011 | GWS, KD, AS, MB & DM |
| GWS027861 | Garbage Beach Breakwater, Woods Hole, MA, USA | 41.525, -70.673 | 15.4.2011 | GWS, KD, AS, MB & DM |
| GWS032106 | Canso Causeway Canal Lighthouse, NS, Canada | 45.648, -61.415 | 15.8.2012 | GWS & AS |
| GWS032362 | Lepreau exposed biodiversity site, Bay of Fundy, NB, Canada | 45.072, -66.469 | 7.5.2015 | GWS & A. Krinis |
| GWS034076 | Maces Bay, Lepreau, Bay of Fundy, NB, Canada | 45.109, -66.482 | 11.9.2013 | GWS, AS & GF |
| GWS034082 | Wallace Cove Lighthouse, NB, Canada | 45.039, -66.808 | 1.5.2013 | GWS, CJ & T. Birch |
| GWS034797 | Maces Bay, Lepreau, Bay of Fundy, NB, Canada | 45.109, -66.482 | 10.10.2013 | AS, GF, CJ |
| GWS038082 | Station Dorm Beach, Espegend, Norway | 60.2692, 5.2212 | 3.6.2016 | GWS & TB |
| *Vertebrata thuyoides* (Harvey) Kuntze | |  |  |  |
| GWS026296 | Spiddal, Co. Galway, Ireland | 53.2467, -9.3027 | 16.10.2012 | M.D. Guiry |
| *Vertebrata woodii* (Harvey) Kuntze | |  |  |  |
| GWS008685 | Bamfield, Seapool Rock, BC, Canada | 48.8155, -125.2086 | 16.6.2007 | GWS, BC, DM & KR |
| GWS022311 | Bird Rock, Pacific Grove, CA, USA | 36.5917, -121.9642 | 22.5.2010 | BC, KH & S. Toews |
| GWS022313 | Bird Rock, Pacific Grove, CA, USA | 36.5917, -121.9642 | 22.5.2010 | BC, KH & S. Toews |
| GWS022318 | Bird Rock, Pacific Grove, CA, USA | 36.5917, -121.9642 | 22.5.2010 | BC, KH & S. Toews |
| GWS027452 | Boscowitz Rock, BC, Canada | 49.011, -123.5866 | 4.5.2011 | GWS, KH & BC |
| GWS027949 | Lost Islands, SE wall, Gwaii Haanas, BC, Canada | 52.80064, -131.484 | 6.7.2011 | GWS & KD |
| GWS028032 | Lost Islands, NE Bay, Gwaii Haanas, BC, Canada | 52.8036, -131.4838 | 6.7.2011 | GWS & KD |
| GWS028649 | Point S of Dodge Point, Gwaii Haanas, BC, Canada | 52.7353, -131.4755 | 11.7.2011 | GWS & KD |
| GWS035981 | Bay south of Bowles Point, Gwaii Haanas, BC, Canada | 52.0648, -131.1194 | 20.8.2013 | GWS & KD |
| GWS036042 | East Limestone Island (N of Cabin Cove), Haida Gwaii, BC, Canada | 52.9095, -131.6081 | 22.8.2013 | GWS & KD |
| GWS038601 | Rocks off the NE corner of Murchison Island, Gwaii Haanas, BC, Canada | 52.6181, -131.4390 | 14.7.2014 | KD & AS |
| GWS039000 | Holland Pt., Langara, Haida Gwaii, BC, Canada | 54.1928, -132.97168 | 13.7.2014 | GWS & MB |

*a*Abbreviations: BC = British Columbia, CA = California, MA = Massachusetts, MB = Manitoba, ME = Maine, NB = New Brunswick, NFLD = Newfoundland and Labrador, NS = Nova Scotia, QC = Quebec, RI = Rhode Island.

*b*Abbreviations: USA = United States of America.

*c*Abbreviations: AS = A. Savoie, BC = B. Clarkston, BH = B. Hooper, CEL=C. Lane, CL = C. Longtin, CJ = C. Jackson, DM = D. McDevit, DS = D. Saunders, GF = G. Filloramo, GWS = G.W. Saunders, HK = H. Kucera, JFC = J. Ferreira Costa, JU = J. Utge, KD = K. Dixon, KH = K. Hind, KM = K. Morrill, KR = K. Roy, LLG = L. Le Gall, LK = L. Kraft, MB = M. Bruce, SC = S. Clayden, SH = S. Hamsher, ST = S. Toews, TB = T. Bringloe.

*d*For collection information for all *Polyostea* samples see Savoie and Saunders (2016).
